# Supplementary material for: Platelet-derived growth factor signaling modulates adult hair follicle dermal stem cell maintenance and self-renewal
Source: PubMed Central journal article supplement (PMC5665619; doi:10.1038/s41536-017-0013-4), 2017-04-14
Supplement: 41536_2017_13_MOESM2_ESM.pdf [file 41536_2017_13_MOESM2_ESM.pdf]

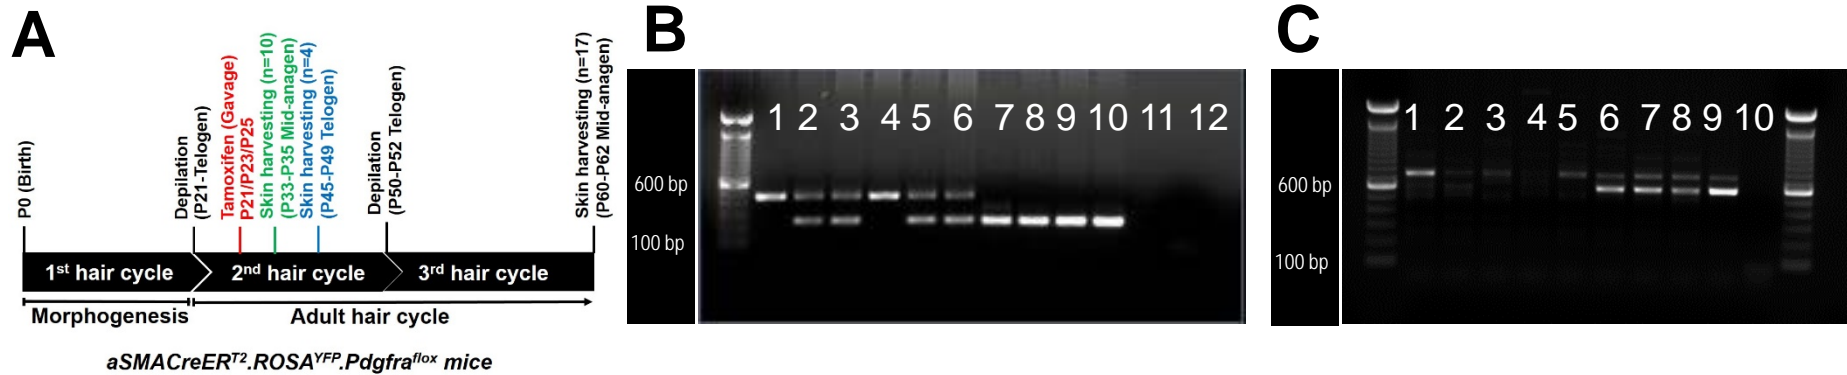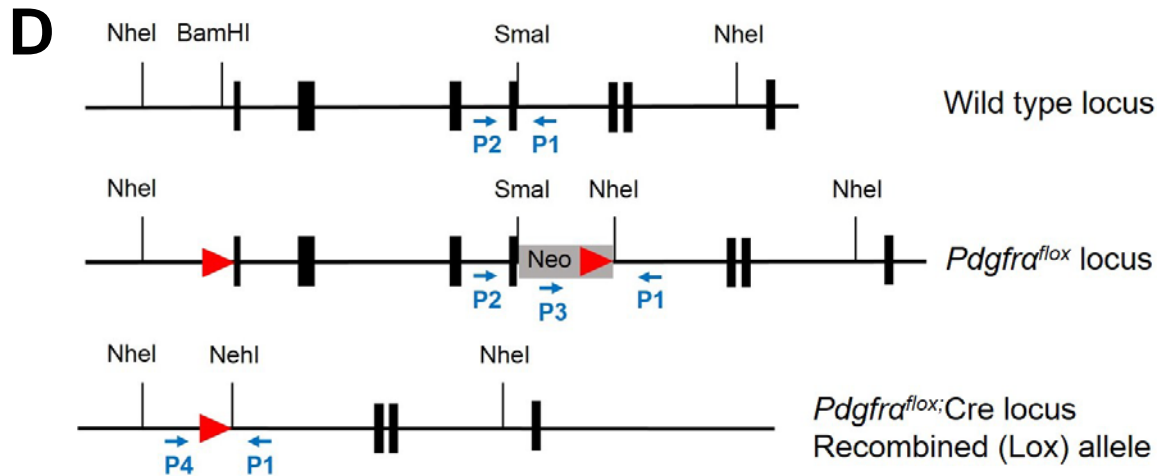

**E**

5' - CACAAGAACACAGGCTGGAAGCCAATGCTCTTGCAGGCTTCCGTCTCACAGAGGCTGCCTCAAAGC  
 TAGGGCTACCTCGAAACCACACGCTATGGTCAAATTGTTCCAGCCTTTTCTGAAAGGAAGACGATTC  
 AACTGCCGATGAGCTGTGATGTGAAGCAAGGGACAGCCCACGAGAAGCAGAGACTTCTCCAGCT  
 TAGATGGAGAACCAGTAGTAACATTTATTCCCCCAATCCCCTTTGGAGACAGTAATTGAGGATCGGCC  
 GCTCTAGAACTAGTGGATCCGGAACCCTTAATAAATTCGTATAATGTATGCTATACGAAGTTATTAG  
 GTCCCTCGACCTGCAGCCCAAGCTAGCTTATCGATACCGTCGAGGGATAAGGAGCTCACGGAACCC  
 CCACAACAGGACTTGTAACCTACACACCAGAGGTGTTTCTCTTGGATGGGCACATCCCTGAGCTTC  
 TCTGGGCCTCAGCTTCCCATCTGGGCAATGGGCACATTTGACTCCAGGACTTTTAATTTTTCTCAATC  
 AGGCAGAGTTTGGCATGACCACAAGGG - 3'

Figure S1
